# Supplementary material for: Novel enzyme-polymer conjugates for biotechnological applications
Source: PeerJ. 2013 Feb 12;1:e27. doi: 10.7717/peerj.27 (PMC3628993; doi:10.7717/peerj.27)
Supplement: Supplemental Information 1 [file peerj-01-27-s001.docx]

**Supporting Information**

## Table S1. Primers used to site-directed mutagenesis of BTL.

| **Mutant** (1) | **Plasmid template** | **Primers** (2) |
| --- | --- | --- |
| C65S/C296S/*A193C* | pT1BTL2mutCys (3) | Ala/cys 193-5 5´-GAAAGCGtgcGCTGTCGCCAG  Ala/cys 193-5 5´- CTGGCGACAGCgcaCGCTTTC |
| C65S C296S *L230C* | pT1BTL2mutCys | Leu/Cys 230-5 5´-CATTATTTTGAACGGtgcAAACG  Leu/Cys 230-3 5´-CGTTTgcaCCGTTCAAAATAATG |

(1) The mutant name shows the amino acid changes and its position in BTL.

(2) The nucleotide changes used to introduce the mutation are indicated in lower case

(3) Plasmid with BTL mutant lacking both of the two native Cys residues (Cys65 and Cys 296).
